# Supplementary material for: Redox-Cycling “Mitocans” as Effective New Developments in Anticancer Therapy
Source: MDPI journal article supplement (doi:10.3390/ijms24098435), 2023-05-08
Supplement: s1 [file s1]

## Supporting information

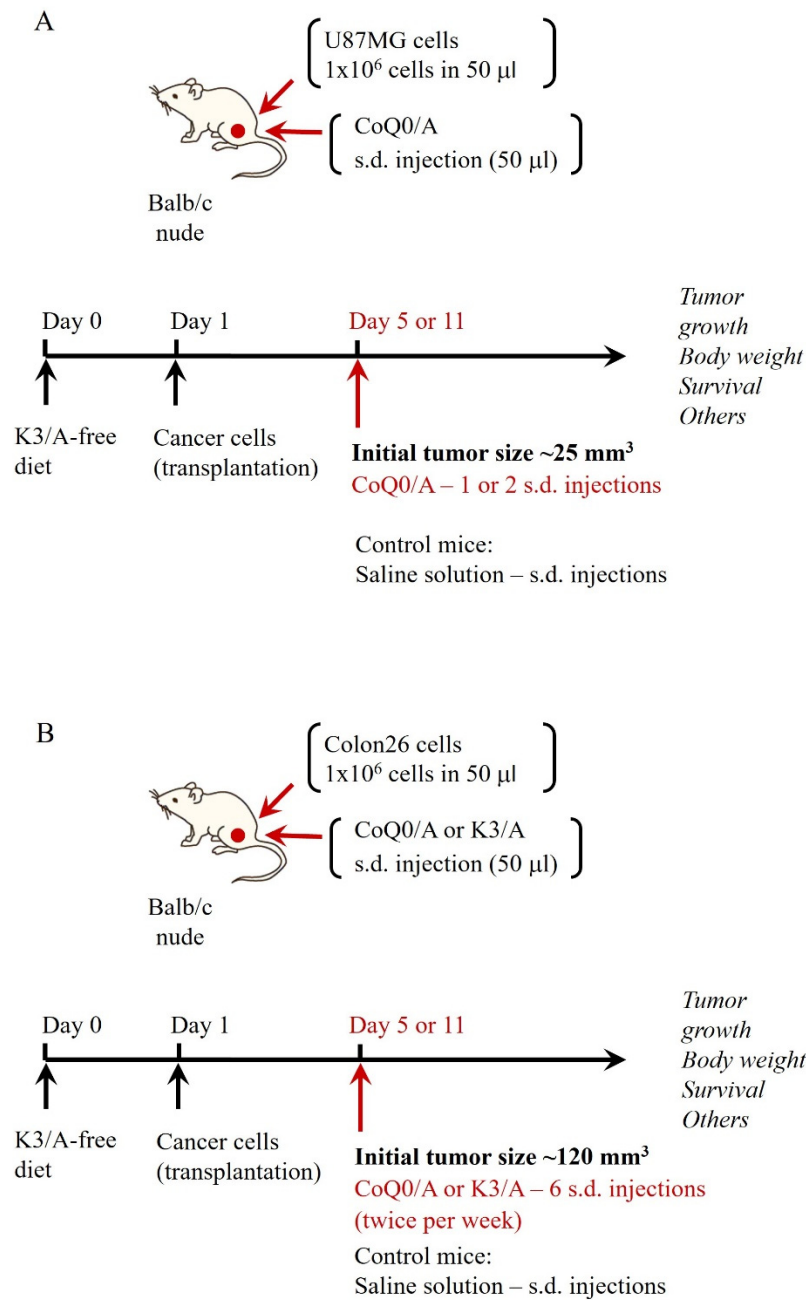

**Figure S1.** Experimental design in vivo: glioblastoma (A) and colon cancer (B) hind paw xenografts and subdermal (s.d.) injection of drug near the tumor.

**Table S1.** Effects of ascorbate, quinone, and their combination on cell viability and proliferation, expressed as percentage of control (untreated) cells – synergism between both substances.

| Concentrations (μM/μM) | 1/100                 | 2/200                 | 3/300                 | 5/500                  | 10/1000                | 20/2000              |
|------------------------|-----------------------|-----------------------|-----------------------|------------------------|------------------------|----------------------|
| Ascorbate only         | 100                   | 100                   | 100                   | 100                    | 83                     | 68                   |
| ThymoQ                 | n.d.                  | 98.5                  | 83.8                  | 70.0                   | 37.5                   | 34.3                 |
| ThymoQ/A               |                       | 76.4                  | 57.3                  | 42.4                   | 29.6                   | 30.0                 |
| P-value                |                       | P<0.05<br>Synergistic | P<0.01<br>Synergistic | P<0.01<br>Synergistic  | P<0.05                 | n.s.                 |
| DMBQ                   | 102.0                 | 94.6                  | 67.5                  | 47.3                   | 35.0                   | 30.2                 |
| DMBQ/A                 | 82.4                  | 67.5                  | 43.1                  | 35.5                   | 30.0                   | 29.3                 |
| P-value                | P<0.05<br>Synergistic | P<0.01<br>Synergistic | P<0.01<br>Synergistic | P<0.05<br>Synergistic  | n.s.                   | n.s.                 |
| MMBQ                   | n.d.                  | 103.5                 | 91.5                  | 86.9                   | 53.8                   | 34.3                 |
| MMBQ/A                 |                       | 78.2                  | 59.2                  | 42.9                   | 36.4                   | 30.0                 |
| P-value                |                       | P<0.05<br>Synergistic | P<0.01<br>Synergistic | P<0.001<br>Synergistic | P<0.01<br>Additive     | n.s.                 |
| CoQ0                   | 100.8                 | 74.0                  | 51.4                  | 37.0                   | 32.6                   | 27.3                 |
| CoQ0/A                 | 72.6                  | 53.1                  | 41.6                  | 32.4                   | 24.4                   | 23.5                 |
| P-value                | P<0.01<br>Synergistic | P<0.05<br>Synergistic | P<0.05<br>Synergistic | n.s.                   | n.s.                   | n.s.                 |
| CoQ1                   | n.d.                  | n.d.                  | 100.5                 | 85.0                   | 80.4                   | 74.5                 |
| CoQ1/A                 |                       |                       | 88.5                  | 80.5                   | 75.3                   | 58.0                 |
| P-value                |                       |                       | n.s.                  | n.s.                   | n.s.                   | P<0.05               |
| CoQ10                  | n.d.                  | n.d.                  | 100.7                 | 102.4                  | 102.5                  | 95.0                 |
| CoQ10/A                |                       |                       | 100.0                 | 102.8                  | 98.5                   | 86.8                 |
| P-value                |                       |                       | n.s.                  | n.s.                   | n.s.                   | n.s.                 |
| K3                     | n.d.                  | n.d.                  | 102.0                 | 96.7                   | 82.0                   | 49.2                 |
| K3/A                   |                       |                       | 77.6                  | 60.7                   | 33.2                   | 33.3                 |
| P-value                |                       |                       | P<0.05<br>Synergistic | P<0.01<br>Synergistic  | P<0.001<br>Synergistic | P<0.05<br>Additive   |
| K1                     | n.d.                  | n.d.                  | 101.3                 | 101.0                  | 85.0                   | 72.4                 |
| K1/A                   |                       |                       | 100.9                 | 96.0                   | 78.2                   | 58.0                 |
| P-value                |                       |                       | n.s.                  | n.s.                   | n.s.                   | P<0.05<br>Additive   |
| K2                     | n.d.                  | n.d.                  | 98.5                  | 95.0                   | 85.5                   | 78.5                 |
| K2/A                   |                       |                       | 100.2                 | 92.3                   | 81.4                   | 80.0                 |
| P-value                |                       |                       | n.s.                  | n.s.                   | n.s.                   | n.s.                 |
| AtovaQ                 | n.d.                  | n.d.                  | 94.0                  | 80.3                   | 60.5                   | 40.3                 |
| AtovaQ/A               |                       |                       | 103.3                 | 92.1                   | 67.5                   | 45.0                 |
| P-value                |                       |                       | n.s.                  | P<0.05                 | n.s.<br>Antagonistic   | n.s.<br>Antagonistic |
| BNQ                    | 103.2                 | 82.6                  | 56.2                  | 48.3                   | 38.8                   | 35.4                 |
| BNQ/A                  | 92.1                  | 63.5                  | 41.8                  | 34.1                   | 35.9                   | 35.5                 |
| P-value                | n.s.                  | P<0.05<br>Synergistic | P<0.05<br>Synergistic | P<0.05<br>Synergistic  | n.s.                   | n.s.                 |

Average data and P values corresponding to Figure 2D are included in the Table.

Synergistic effect: When the effect of Q/A is higher than the sum of the effects of Q and

A administered alone.

Additive effect: When the effect of Q/A is equal to the sum of the effects of Q and A administered alone.

Antagonistic effect: When the effect of Q/A is lower than the sum of the effects of Q and A administered alone.
